# Supplementary material for: Energetic interpenetrating polymer network (EIPN): enhanced thermo-mechanical properties of NCO-fMWCNTs/HTPB PU and alkyne-fMWCNTs/acyl-GAP based nanocomposite and its propellants
Source: Royal Society of Chemistry journal article supplement (doi:10.1039/c6ra07742k), 2016-01-01
Supplement: c6ra07742k1.pdf [file c6ra07742k1.pdf]

## Energetic Interpenetrating Polymer Network (EIPN): Enhanced Thermo-Mechanical Properties of NCO-*f*MWCNTs/HTPB PU and Alkyne-*f*MWCNTs/Acyl-GAP based Nanocomposite and its Propellants

### (Supporting Information)

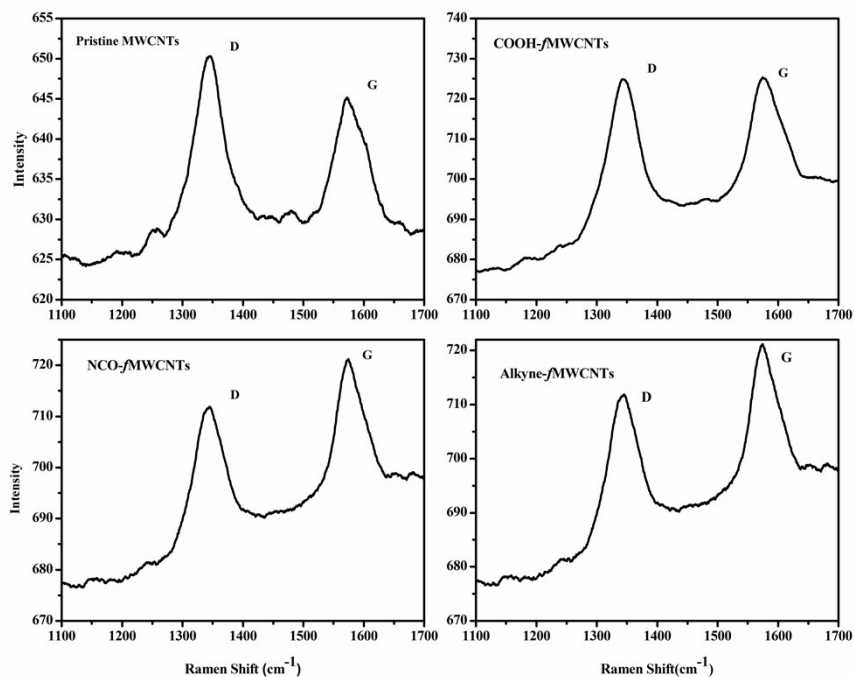

Figure 1: Raman spectra of pristine MWCNTs, COOH-*f*MWCNTs, NCO-*f*MWCNTs and Alkyne-*f*MWCNTs

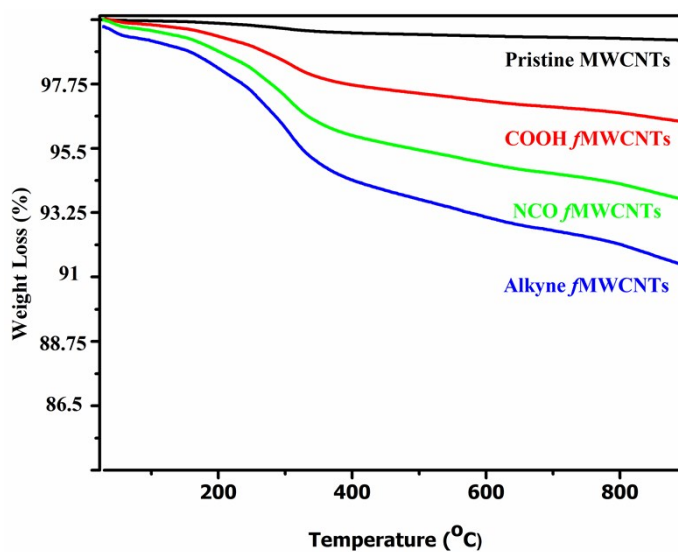

Figure 2: TGA curves of pristine MWCNTs, COOH-*f*MWCNTs, NCO-*f*MWCNTs and Alkyne-MWCNTs up to 900 °C.

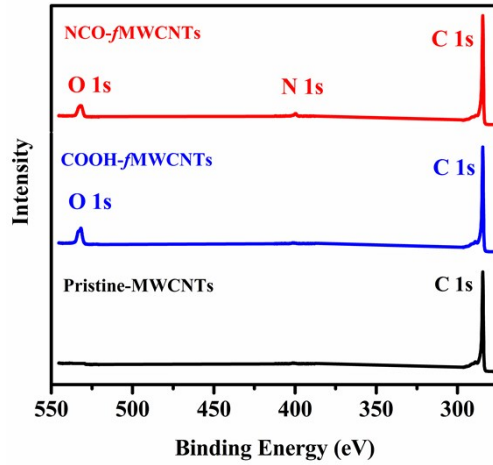

**Figure 3:** XPS survey scans of pristine MWCNTs, COOH-fMWCNTs and NCO-fMWCNTs.

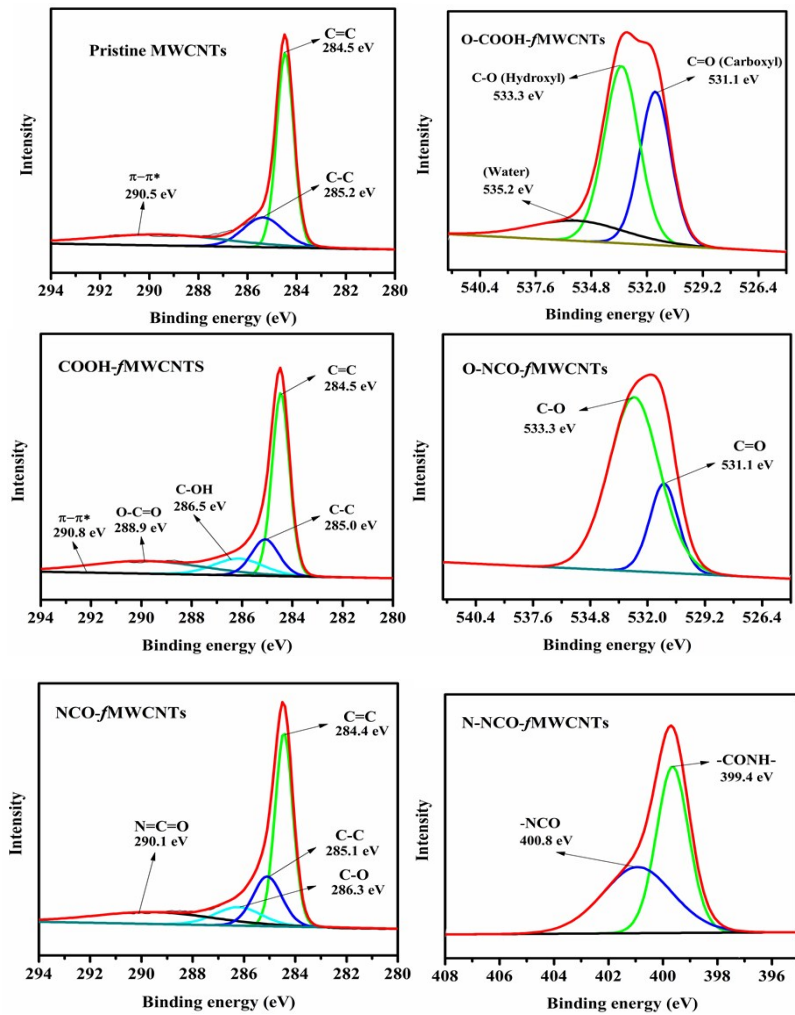

**Figure 4:** High resolution C1s XPS spectra of pristine MWCNTs, COOH-fMWCNTs and NCO-fMWCNT .

**Figure 5:** High resolution O1s and N1s XPS spectra of COOH-fMWCNTs

**Table 1:** Mechanical properties and thermal properties of various propellants cured with different curing agents

| CONSTITUENTS              | GAP/IPDI/N100<br>NCO/OH = 1<br>(Wt. %) | HTPB/IPDI/N100<br>NCO/OH = 1<br>(Wt. %) | Alkyne-fMWCNTs<br>Acyl-GAP<br>(Wt. %) | NCO-fMWCNTs/<br>HTPB NCO/OH=1<br>(Wt. %) | NCO-fMWCNTs HTPB<br>/ Alkyne-fMWCNTs<br>Acyl-GAP (Wt. %) |
|---------------------------|----------------------------------------|-----------------------------------------|---------------------------------------|------------------------------------------|----------------------------------------------------------|
| <b>Mech Prop. (21 °C)</b> |                                        |                                         |                                       |                                          |                                                          |
| Tensile st. / MPa         | 0.37                                   | 0.62                                    | 0.59                                  | 0.86                                     | 0.97                                                     |
| Elong at Brek. (%)        | 25                                     | 47                                      | 41                                    | 58                                       | 63                                                       |
| <b>Thermal Prop.</b>      |                                        |                                         |                                       |                                          |                                                          |
| Tg DMA 1 Hz               | - 37.8                                 | - 76.6                                  | - 37.3                                | - 78.0                                   | - 75.3 °C & - 36 °C                                      |
| DSC onset °C              | - 33.5                                 | - 81.8                                  | - 32.6                                | - 83.8                                   | - 81.7 °C & - 38 °C                                      |
| DSC offset °C             | - 39.4                                 | - 72.8                                  | - 40.6                                | - 74.2                                   | - 71.3 °C & - 36 °C                                      |
| Mid-point °C              | - 36.6                                 | - 75.3                                  | - 36.5                                | - 77.5                                   | - 75.4 °C & - 36 °C                                      |

**Table 2:** Theoretical Ballistic properties of various propellants with 80 and 60 % Solid loadings

| Ballistic Property                                           | Alkyne fMWCNTs<br>Acyl-GAP<br>(Wt. %)<br>(80 % Solid) | NCO-fMWCNTs/<br>HTPB NCO/OH=1<br>(Wt. %)<br>(80 % Solid) | NCO-fMWCNTs HTPB<br>/ Alkyne-fMWCNTs<br>Acyl-GAP (Wt. %)<br>(80 % Solid) | ADN/GAP-<br>BuNENA<br>(80 % Solid) | HMX/GAP-<br>BuNENA<br>(80 % Solid) | HMX/GAP-<br>BuNENA<br>(60 % Solid)  |
|--------------------------------------------------------------|-------------------------------------------------------|----------------------------------------------------------|--------------------------------------------------------------------------|------------------------------------|------------------------------------|-------------------------------------|
| Theoretical Specific Impulse $I_{sp}$ (Ns kg <sup>-1</sup> ) | 2684.8                                                | 2621.6                                                   | 2652.1                                                                   | 2601 (Ref :67)                     | 2404 (Ref : 67 )                   | 2163 (Ref : 67 )<br>2154 (Ref : 68) |
| Theoretical density (gcm <sup>3</sup> )                      | 1.85                                                  | 1.767                                                    | 1.80                                                                     |                                    |                                    |                                     |
| Oxygen balance (OB)                                          | -0.554                                                | -0.778                                                   | -0.685                                                                   |                                    |                                    |                                     |
| Density Impulse                                              | 4966.88                                               | 4632.36                                                  | 4773.78                                                                  |                                    |                                    |                                     |

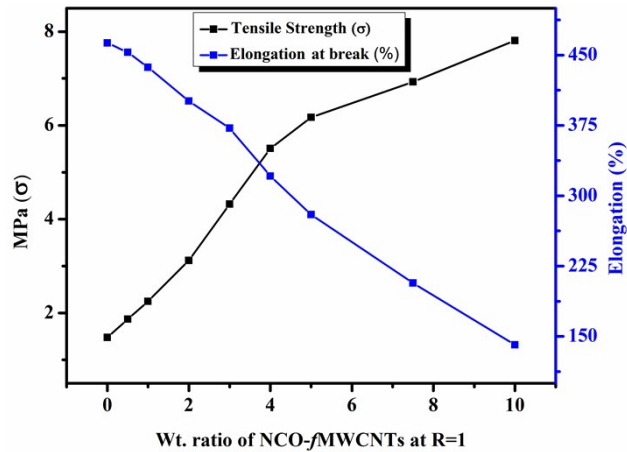

**Figure 6:** Effect of NCO-fMWCNTs on the tensile strength ( $\sigma$ ) and breaking elongation ( $\epsilon_b$ ) of HTPB at R=1.

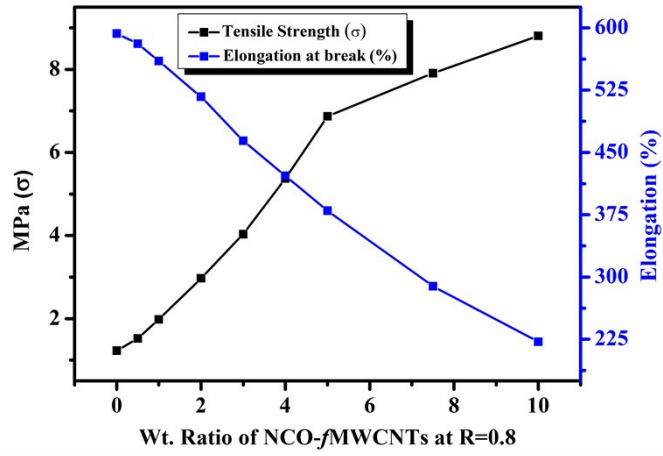

Figure 7: Effect of NCO-fMWCNTs on the tensile strength ( $\sigma$ ) and breaking elongation ( $\epsilon_b$ ) of HTPB at R=0.8.

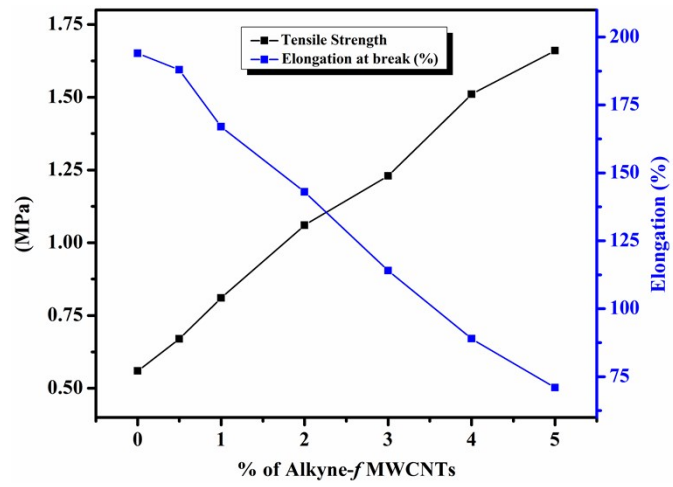

Figure 8: Effect of Alkyne-fMWCNTs on the tensile strength ( $\sigma$ ) and breaking elongation ( $\epsilon_b$ ) of Acyl-GAP.

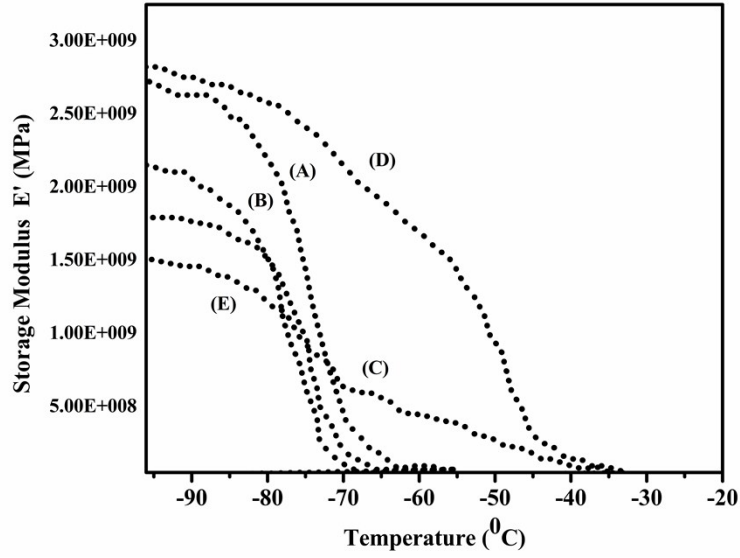

**Figure 9.** Variation of storage modulus with temperature for (A) 0 % Acyl-GAP, (B) 10 %, (C) 30 % (D) 50 %, (E) 70 % Acyl-GAP in NCO-*f*MWCNTs/HTPB: Alkyne-*f*MWCNTs/Acyl-GAP EIPNs.

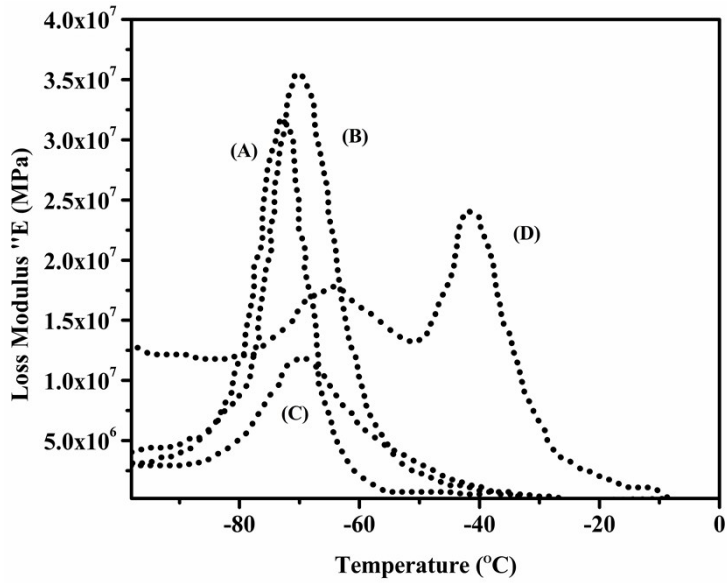

**Figure 10.** Variation of loss modulus with temperature for (A) 0 % Acyl-GAP, (B) 10 %, (C) 30 % (D) 50 %, (E) 70 % Acyl-GAP in NCO-*f*MWCNTs/HTPB: Alkyne-*f*MWCNTs/Acyl-GAP EIPNs.
